# Supplementary material for: Results of salvage therapy with mini-hyper-CVD and inotuzumab ozogamicin with or without blinatumomab in pre-B acute lymphoblastic leukemia
Source: J Hematol Oncol. 2023 May 2;16:44. doi: 10.1186/s13045-023-01444-2 (PMC10155451; doi:10.1186/s13045-023-01444-2)

**Title:** Results of Salvage Therapy with Mini-Hyper-CVD and Inotuzumab Ozogamicin with or without Blinatumomab in Pre-B Acute Lymphoblastic Leukemia

Supplementary Information

***Supplemental Tables***

**Supplemental Table 1.** Best overall response by salvage status

**Supplemental Table 2.** Characteristics and treatments of patients who did not undergo allogeneic stem cell transplantation and remained alive and disease free

**Supplemental Table 3.** Univariate and multivariate analysis for overall survival

**Supplemental Table 4.** Characteristics and outcome of patients with hepatic sinusoidal obstruction syndrome

***Supplemental Figures***

**Supplemental Figure 1.** Visual schematic of the (A) original study design and (B) modified study design

**Supplemental Figure 2.** Consort diagram

**Supplemental Figure 3.** Overall survival by treatment modality in Salvage 1

**Supplemental Figure 4.** Overall survival by *TP53* mutation status

**Supplemental Figure 5.** Overall survival by cytogenetic risk

## Supplemental Tables

**Supplemental Table 1.** Best overall response by salvage status

|             | <b>S1<br/>(n=79)</b> | <b>S1 PR<br/>(n=15)</b> | <b>S1 CR&lt;12months<br/>(n=26)</b> | <b>S1 CR&gt;12 months<br/>(n=38)</b> | <b>S2<br/>(n=17)</b> | <b>S3+<br/>(n=14)</b> |
|-------------|----------------------|-------------------------|-------------------------------------|--------------------------------------|----------------------|-----------------------|
| CR          | 57 (72)              | 15 (100)                | 16 (62)                             | 26 (68)                              | 8 (47)               | 4 (29)                |
| CRp         | 14 (18)              | 0                       | 5 (19)                              | 9 (24)                               | 1 (6)                | 4 (29)                |
| CRi         | 2 (3)                | 0                       | 1 (4)                               | 1 (3)                                | 1 (6)                | 0                     |
| Overall     | 73 (92)              | 15 (100)                | 22 (85)                             | 36 (95)                              | 10 (59)              | 8 (57)                |
| Early Death | 1 (2)                | 0                       | 1 (4)                               | 0                                    | 3 (18)               | 3 (21)                |
| No Response | 5 (6)                | 0                       | 3 (12)                              | 2 (5)                                | 4 (24)               | 3 (21)                |

**Abbreviations:** CR, complete response; CRi, CR with incomplete hematologic recovery; CRp, CR without platelets recovery; S1, salvage 1; PR, primary refractory; S2, salvage 2; S3, salvage 3

**Supplemental Table 2.** Characteristics and treatments of patients who did not undergo allogeneic stem cell transplantation and remained alive and disease free

| Pt | Age (years) | Salvage status | Cytogenetics                    | Mutations        | Time to MRD negativity (days) | Cohort | Treatment           | Number of InO cycles | Number of Blina cycles | Status of therapy                      |
|----|-------------|----------------|---------------------------------|------------------|-------------------------------|--------|---------------------|----------------------|------------------------|----------------------------------------|
| 1  | 73          | S1             | Diploid                         | NA               | 74                            | OD     | Mini-HCVD-InO       | 4                    | 0                      | Off therapy (subsequent HCVD and POMP) |
| 2  | 30          | S1             | Diploid                         | NA               | 18                            | MD     | Mini-HCVD-InO-Blina | 2                    | 4                      | Off therapy (observation)              |
| 3  | 85          | S1             | Hyperdiploid                    | NA               | 136                           | OD     | Mini-HCVD-InO       | 2                    | 0                      | Off therapy (observation)              |
| 4  | 29          | S3             | Diploid                         | NA               | 77                            | OD     | Mini-HCVD-InO       | 3                    | 0                      | Off therapy (subsequent CAR-T)         |
| 5  | 42          | S1             | CRLF2::IGH rearrangement        | JAK2             | 14                            | MD     | Mini-HCVD-InO-Blina | 4                    | 4                      | Off therapy (observation)              |
| 6  | 71          | S1             | t(1;6)(q25;q21) and add(7)(q36) | NA               | 21                            | OD     | Mini-HCVD-InO       | 4                    | 0                      | Off therapy (observation)              |
| 7  | 29          | S1             | Diploid                         | None             | 21                            | MD     | Mini-HCVD-InO-Blina | 4                    | 4                      | On maintenance POMP/Blina              |
| 8  | 38          | S1             | t(1;19)(q23;p13.3)              | None             | 20                            | MD     | Mini-HCVD-InO-Blina | 4                    | 4                      | On maintenance POMP/Blina              |
| 9  | 48          | S1             | Hyperdiploid                    | TP53, FLT3 D835Y | 32                            | MD     | Mini-HCVD-InO-Blina | 4                    | 4                      | On maintenance POMP/blina              |
| 10 | 57          | S1             | Insufficient metaphases         | NA               | 65                            | OD     | Mini-HCVD-InO       | 4                    | 0                      | Off therapy (subsequent CAR-T)         |

**Abbreviations:** Blina, blinatumomab; CAR-T, chimeric antigen receptor T-cell therapy; HCVD, hyper-CVD; HCVD; hyper-CVD; InO, inotuzumab ozogamizin; MD, modified study design; MRD, measurable residual disease; NA, not available; OD, original study design; Pt, patient; S, salvage

**Supplemental Table 3.** Univariate and multivariate analysis for overall survival

|                                 | Univariate |       |             | Backward multivariate |       |             |
|---------------------------------|------------|-------|-------------|-----------------------|-------|-------------|
|                                 | <i>P</i>   | HR    | 95% CI      | <i>P</i>              | HR    | 95% CI      |
| Age                             | 0.626      | 1.004 | 0.989-1.018 |                       |       |             |
| Gender: Female vs. male         | 0.764      | 1.076 | 0.669-1.729 |                       |       |             |
| ECOG PS: 0-1 vs. 2+             | 0.692      | 1.130 | 0.617-2.067 |                       |       |             |
| Salvage: 1 vs. 2+               | 0.012      | 1.863 | 1.147-3.025 |                       |       |             |
| White blood cell count          | 0.047      | 1.009 | 1.000-1.018 |                       |       |             |
| % blasts in PB                  | 0.003      | 1.011 | 1.004-1.018 | 0.001                 | 1.014 | 1.006-1.022 |
| % blasts in BM                  | 0.059      | 1.008 | 1.000-1.017 |                       |       |             |
| CNS leukemia                    | 0.483      | 1.386 | 0.557-3.451 |                       |       |             |
| CD19                            | 0.089      | 0.992 | 0.983-1.001 |                       |       |             |
| CD20                            | 0.339      | 0.996 | 0.988-1.004 |                       |       |             |
| CD22                            | <0.001     | 0.979 | 0.969-0.988 |                       |       |             |
| Cytogenetics risk: Low vs. high | <0.001     | 3.515 | 2.137-5.781 | <0.001                | 2.765 | 1.606-4.761 |
| CRLF2                           | 0.882      | 1.055 | 0.523-2.126 |                       |       |             |
| TP53 mutation                   | <0.001     | 2.680 | 1.625-4.419 | 0.004                 | 2.354 | 1.318-4.202 |
| Treatment post amendment        | 0.038      | 0.588 | 0.355-0.972 | 0.033                 | 0.574 | 0.345-0.956 |
| ASCT (time-dependent)           | 0.409      | 0.792 | 0.455-1.378 |                       |       |             |

**Abbreviations:** ASCT, allogeneic stem cell transplantation; BM, bone marrow; CNS, central nervous system; CRLF2, cytokine receptor like factor 2; ECOG, Eastern Cooperative Oncology Group; HR, hazard ratio; PB, peripheral blood

**Supplemental Table 4.** Characteristics and outcome of patients with hepatic sinusoidal obstruction syndrome

| Parameter                           | Patients |            |            |         |         |        |        |            |           |               |
|-------------------------------------|----------|------------|------------|---------|---------|--------|--------|------------|-----------|---------------|
| Age, (years)                        | 31       | 19         | 39         | 27      | 30      | 38     | 26     | 46         | 50        | 39            |
| Prior ASCT                          | Yes      | No         | No         | Yes     | No      | Yes    | No     | Yes        | No        | No            |
| Conditioning                        | Flu/Clo  | NA         | NA         | Flu/Clo | NA      | Cy/TBI | NA     | Bu/Flu/Clo | NA        | NA            |
| Number of cycles                    | 3        | 2          | 2          | 1       | 4       | 4      | 5      | 3          | 3         | 2 + 2Blina    |
| Total InO dose (mg/m <sup>2</sup> ) | 4.4      | 3.1        | 3.1        | 1.8     | 5.4     | 5.4    | 4.3    | 3.3        | 3.3       | 1.5           |
| Blina cohort                        | No       | No         | No         | No      | No      | No     | No     | No         | No        | Yes           |
| Subsequent ASCT                     | No       | Yes        | Yes        | No      | Yes     | Yes    | Yes    | No         | Yes       | Yes           |
| Conditioning                        | CAR-T    | Flu/Bu/Clo | Flu/Bu/Clo | NA      | Flu/Mel | Flu/Bu | Bu/Clo | NA         | Flu/Bu/Cy | Etoposide/TBI |
| Status                              | Died     | Died       | Died       | Died    | Died    | Alive  | Died   | Died       | Died      | Died          |
| Causality                           | Related  | NR         | NR         | Related | NR      | NA     | NR     | NR         | Related   | Related       |

**Abbreviations:** ASCT, allogeneic stem cell transplantation; Blina, blinatumomab; Bu, busulfan; Clo, clofarabine; Cy, cyclophosphamide; Flu, fludarabine; InO, Inotuzumab ozogamicin; NR, not related; TBI, total body irradiation; VOD, veno-occlusive disease

**Supplemental Figure 1.** Visual schematic of the (A) original study design and (B) modified study design

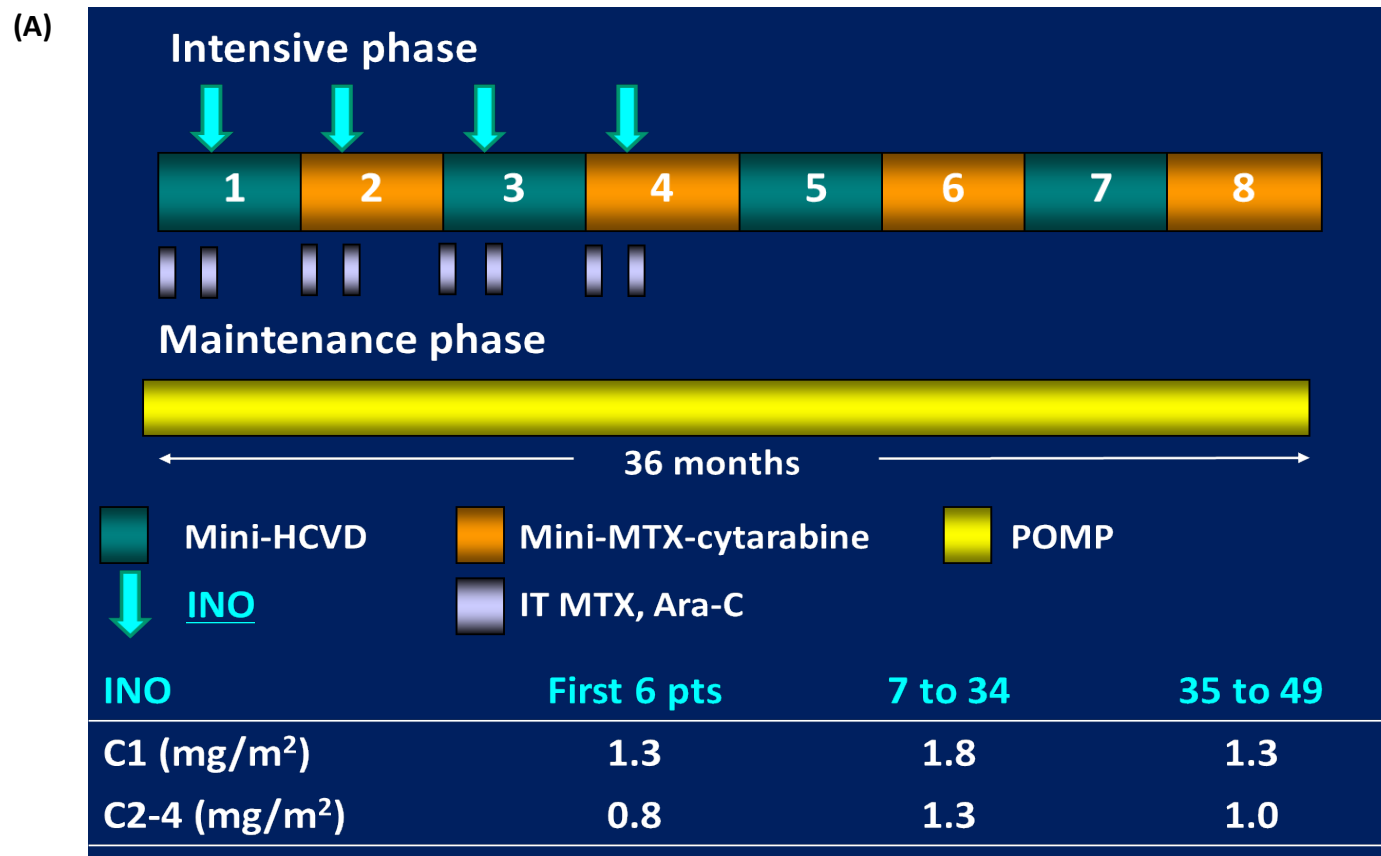

(B)

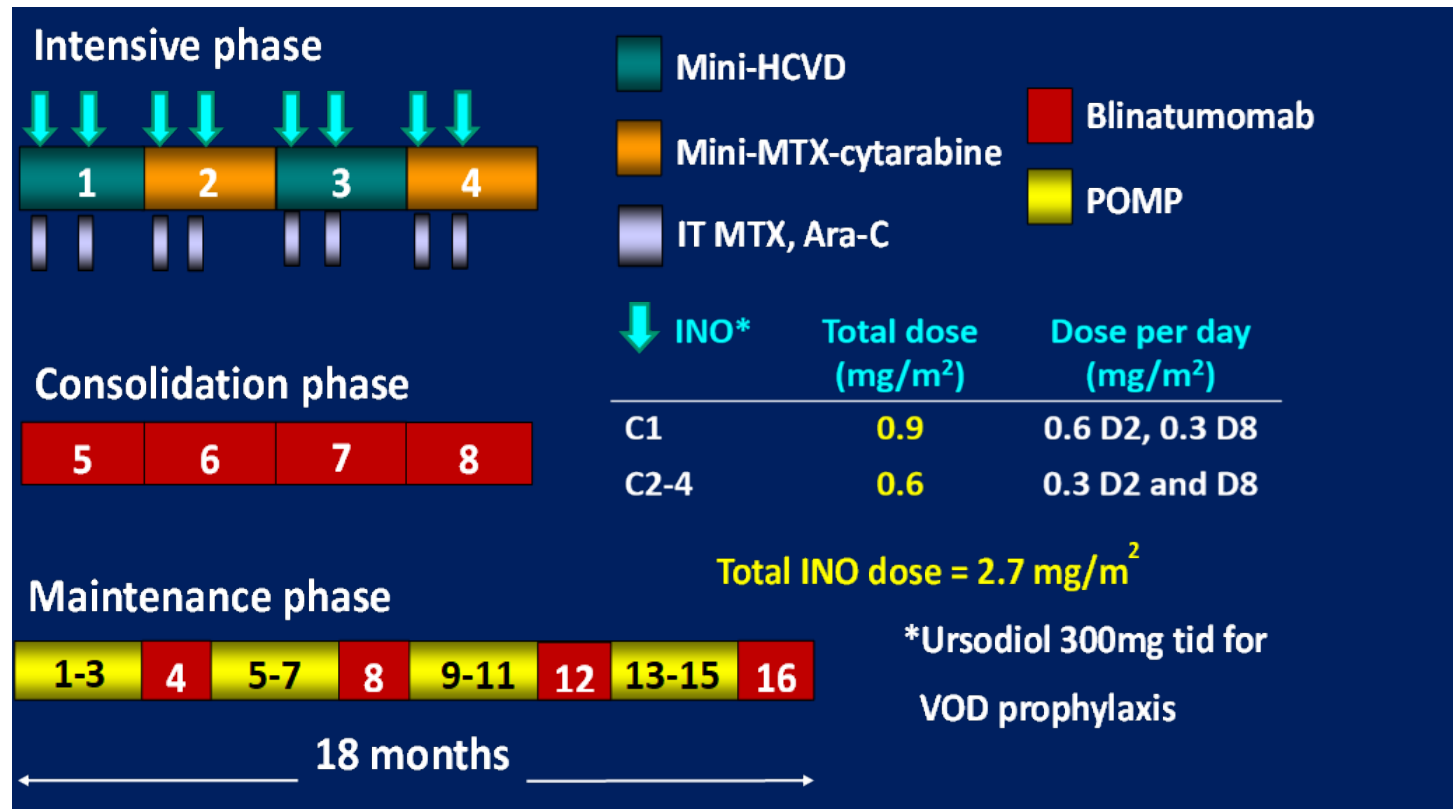

**Supplemental Figure 2.** Consort diagram

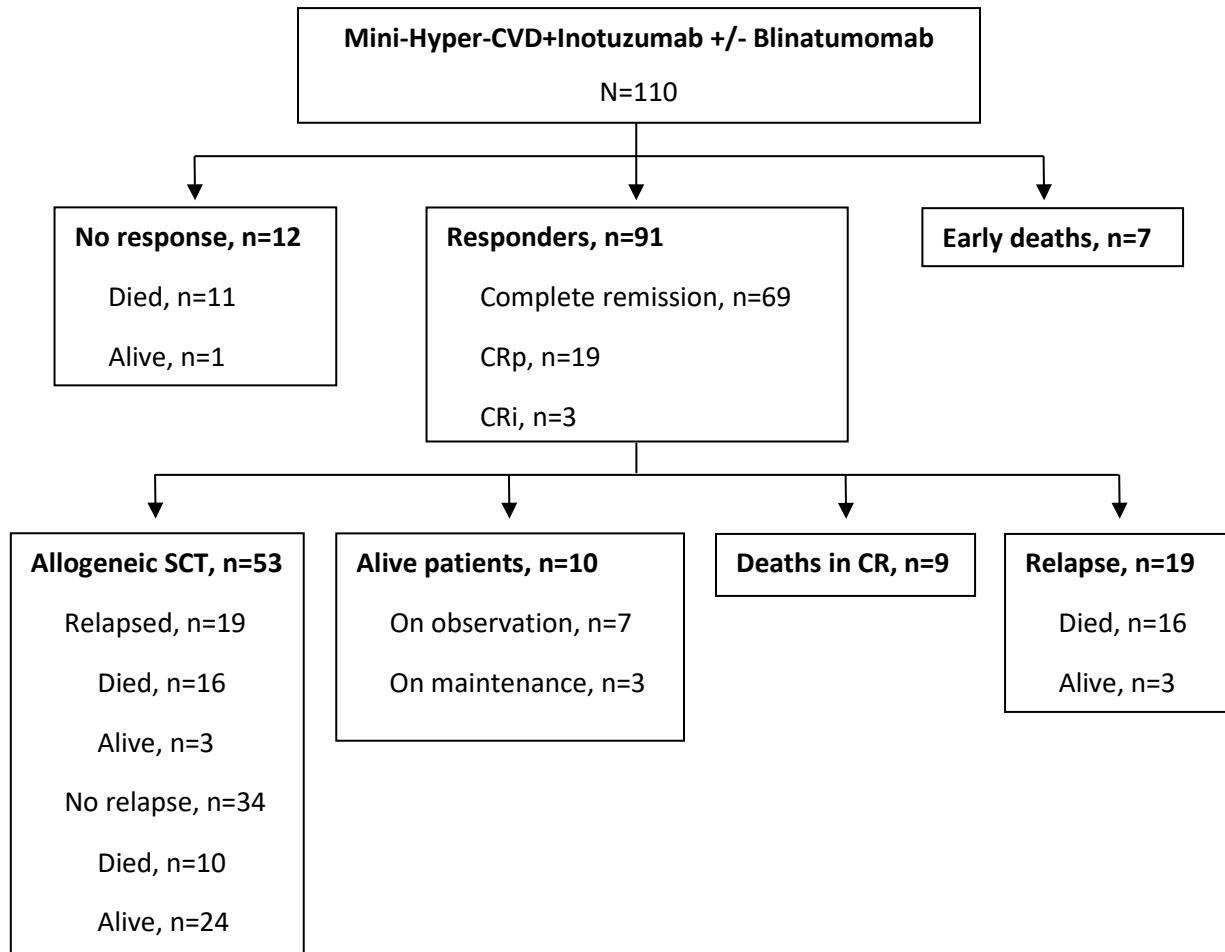

Supplemental Figure 3. Overall survival by treatment modality in Salvage 1

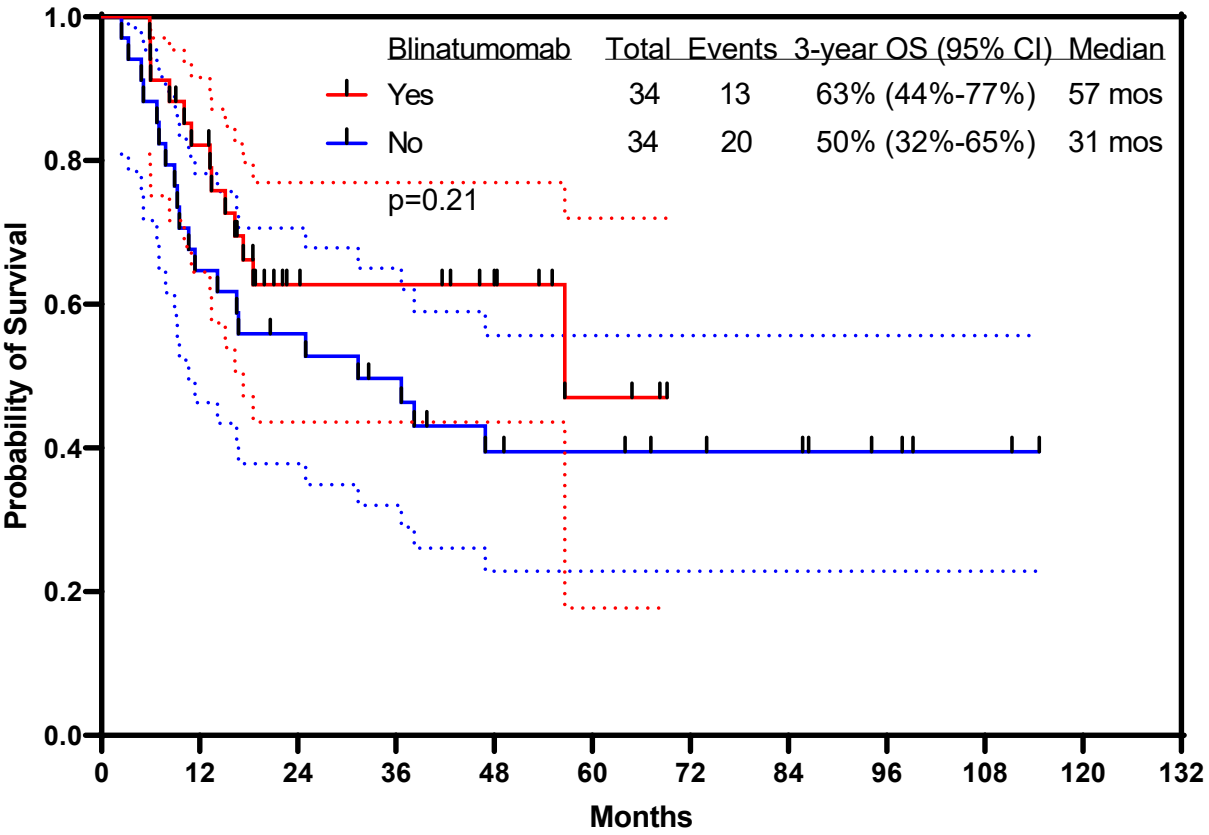

Supplemental Figure 4. Overall survival by *TP53* mutation status

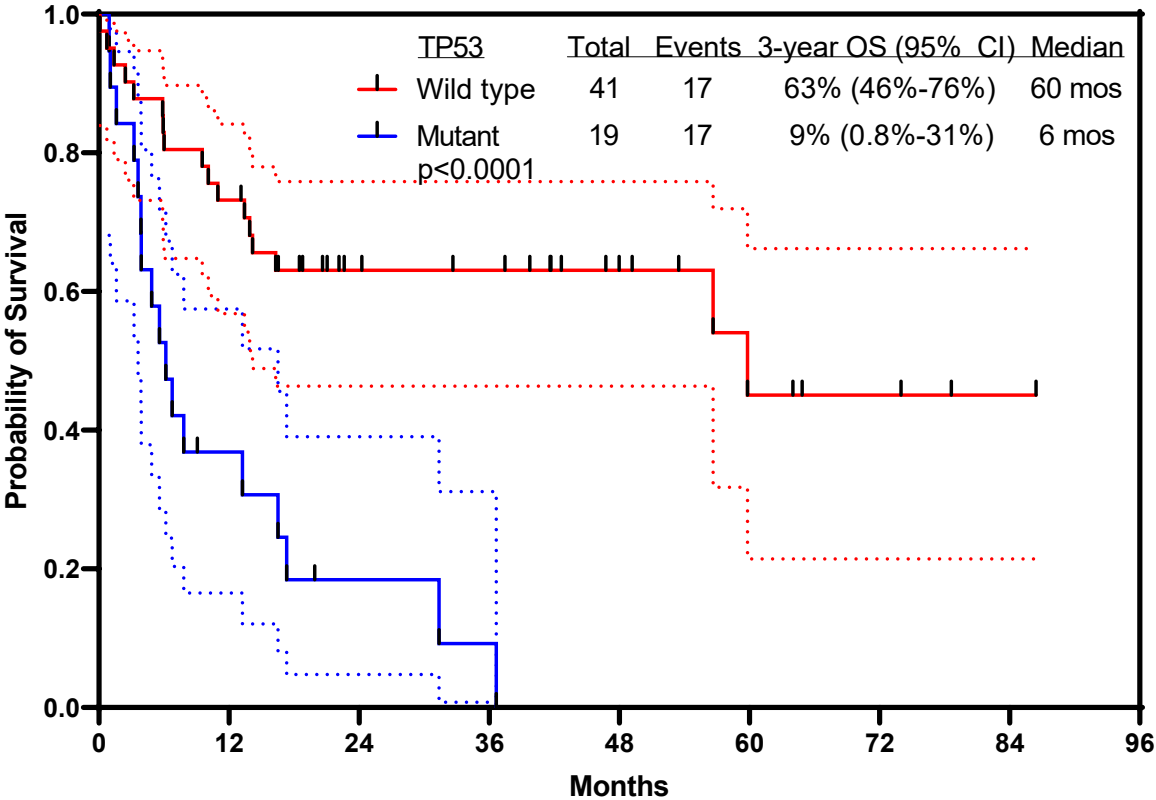

Supplemental Figure 5. Overall survival by cytogenetic risk

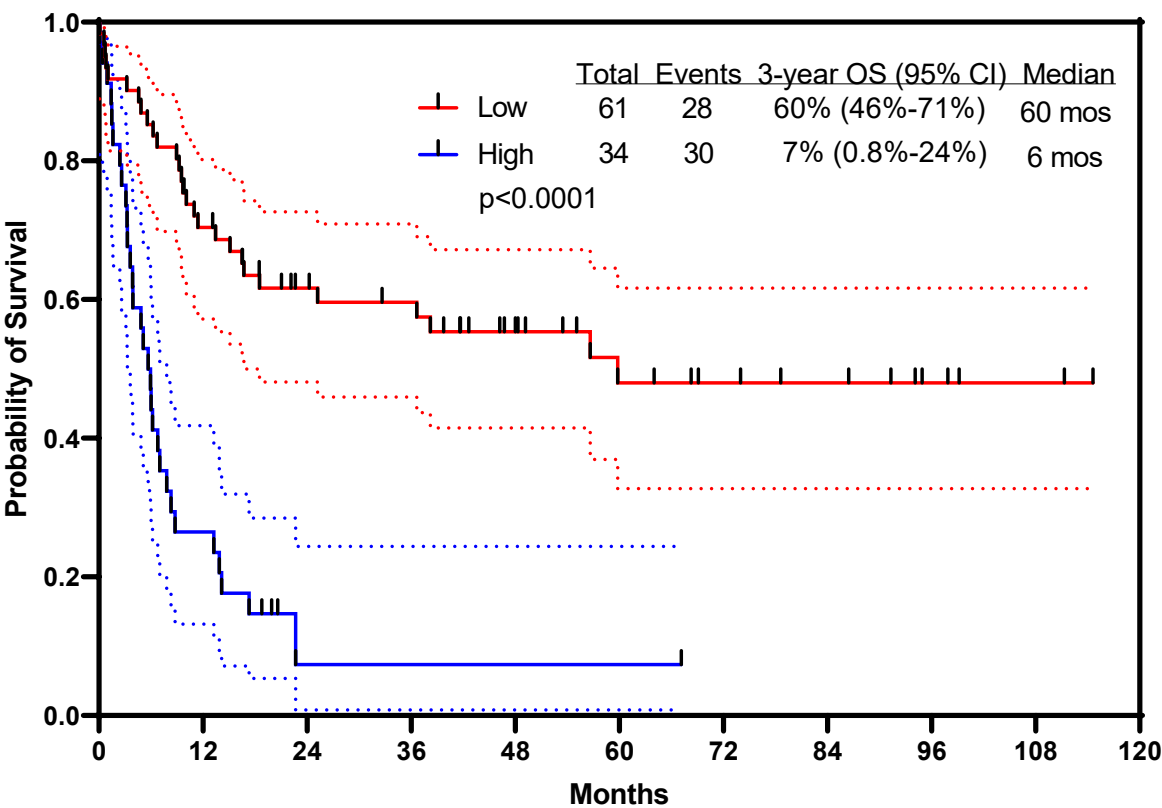

Supplement: Supplementary file 1 — Additional file 1: Fig. S1. Visual schematic of the A original study design and B modified study design. Fig. S2. Consort diagram. Table S1. Best overall response by salvage status. Fig. S3. Overall survival by treatment modality in Salvage 1. Table S2. Characteristics and treatments of patients who did not undergo allogeneic stem cell transplantation and remained alive and disease free. Fig. S4. Overall survival by TP53 mutation status. Fig. S5. Overall survival by cytogenetic risk. Table S3. Univariate and multivariate analysis for overall survival. Table S4. Characteristics and outcome of patients with hepatic sinusoidal obstruction syndrome. [file 13045_2023_1444_MOESM1_ESM.pdf]
